# Supplementary material for: Study of inhibitory effect of mercury(ii) ion on exonuclease iiivia gel electrophoresis and microfluidic electrophoresis
Source: Royal Society of Chemistry journal article supplement (doi:10.1039/c2ay25214g), 2012-01-01
Supplement: c2ay25214g.pdf [file c2ay25214g.pdf]

# Inhibitory effect of mercury(II) ion on exonuclease III via gel electrophoresis and microfluidic electrophoresis

Min Yuan<sup>a,b</sup>, Yonggang Zhu<sup>b,\*</sup>, Xinhui Lou<sup>c,\*</sup>, Chen Chen<sup>b,d,e</sup>, Gang Wei<sup>e</sup>, Minbo Lan<sup>d</sup>, Jianlong Zhao<sup>a,\*</sup>

<sup>a</sup> State Key Lab of Transducer Technology, Shanghai Institute of Microsystem and Information Technology, Chinese Academy of Sciences, 865 Changning Rd, Shanghai 200050, China.

<sup>b</sup> CSIRO Materials Science and Engineering, PO Box 56, Highett, VIC 3190, Australia.

<sup>c</sup> Department of Chemistry, Capital Normal University, 105 Xisanhuan North Rd, Beijing 100084, China.

<sup>d</sup> Shanghai Key Laboratory for Functional Material Chemistry, East China University of Science and Technology, Meilong Road 130, Shanghai 200237, China.

<sup>e</sup> CSIRO Materials Science and Engineering, PO Box 218, Lindfield, NSW 2070, Australia

\* Corresponding authors: [yonggang.zhu@csiro.au](mailto:yonggang.zhu@csiro.au) (Y. Zhu), Tel: (+ 61 3) 95452791;

[xlou9999@yahoo.com](mailto:xlou9999@yahoo.com) (X. Lou);

[jlzhao@mail.sim.ac.cn](mailto:jlzhao@mail.sim.ac.cn) (J. Zhao).

## Supplementary Information

### 1. Preparation of 15% polyacrylamide gel

2 mL of 10× TBE buffer (890 mM Tris, 890 mM boric acid, 20 mM EDTA), 7.5 mL of 40% Acrylamide/Bis-acrylamide (19:1) solution and 200 µL of 10% ammonium persulfate solution were mixed homogeneously in 10.3 mL of deionized water, where the ammonium persulfate was utilized for the cross linking of acrylamide monomer. As a catalyst, 20 µL of N,N,N',N'-tetramethylethylenediamin (TEMED), was added and blended uniformly in order to catalyse the cross-linking reaction. The uniform mix was instantly poured into the gel-making kit and followed a 10 holes or 15 holes comb. The polyacrylamide gel would be generated after 1 hour under dark condition at room temperature.

### 2. Formation of 21 bp dsDNA

25 µL of 15 µM probe 21-N and 25 µL of 15 µM probe 21-C were added into 125 µL of hybridized buffer solution which contained 20 mM Mops, 100 mM NaNO<sub>3</sub>, pH 7.2, and mixed immediately until well-distributed. After 30 minutes hybridization at room temperature, 21 bp dsDNA N-C with a concentration of 2.14 µM was generated in the mixture. Another 21 bp dsDNA AB-PM which was bond by probe AB and probe PM was also made following the above protocol. The final concentration of AB-PM generated was 1.43 µM.

### 3. Degradations of AB-PM and AB by Exo III without $Hg^{2+}$

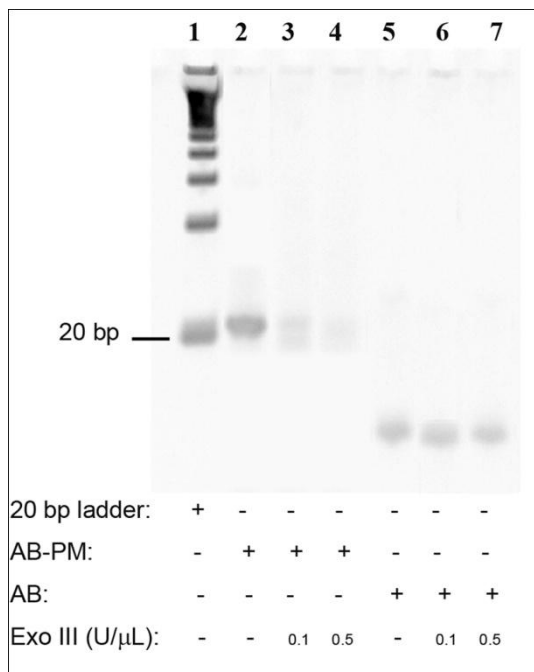

Fig S1. The degradation characteristics of Exo III on 21 bp dsDNA AB-PM and 21 mer ssDNA AB. The symbol “-” means absence whereas the symbol “+” means presence. The concentrations of AB-PM and AB were both 1 μM.
